# Supplementary material
Source: PubMed Central journal article supplement (PMC11072726)
Supplement: 18_2022_4168_MOESM1_ESM.pdf [file 18_2022_4168_MOESM1_ESM.pdf]

## Supplementary Materials

### MicroRNA-24-3p promotes skeletal muscle differentiation and regeneration by regulating HMGA1

Paromita Dey<sup>1</sup>, Miles A. Soyer<sup>1,2</sup>, and Bijan K. Dey<sup>1,2,#</sup>

<sup>1</sup>The RNA Institute, <sup>2</sup>Department of Biological Sciences, University at Albany, State University of New York (SUNY), 1400 Washington Avenue, Albany, New York 12222

# Correspondence: [bdey@albany.edu](mailto:bdey@albany.edu)

**Running title:** miR-24-3p regulates skeletal muscle differentiation and regeneration

**Keywords:** skeletal muscle stem cell, myoblast, differentiation, development, regeneration, microRNA, miR-24-3p, HMGA1, Id3

The supplementary pdf file includes:

Suppl Table 1: miR-24-3p increases and Ant-24 decreases number of MYOG- and MHC-positive cells.

Suppl Table 2: List of oligos used in this study.

Suppl Fig 1: miR-24-3p is upregulated during C2C12 myoblast differentiation.

Suppl Fig 2: miR-24-3p promotes C2C12 myoblast differentiation.

Suppl Fig 3: miR-24-3p level is downregulated in the Ant-24-transfected primary myoblasts.

Suppl Fig 4: Ant-24 represses primary myoblast differentiation.

Suppl Fig 5: RNA hybrid microRNA target prediction algorithm identifies non-seed match miR-24-3p target sites in the 3'UTR of *Hmga1*.

Suppl Fig 6: miR-24-3p regulates HMGA1's direct downstream target *Id3* transcript level during myoblast differentiation.

Suppl Fig 7: *Myog* and *Mhc* transcript levels are downregulated in the undifferentiated and differentiated MuSCs isolated from Ant-24-injected neonatal mice.

Suppl Fig 8: Increased presence of various cells, including inflammatory cells are observed in the Ant-24-injected regenerating skeletal muscle.

Suppl Fig 9: Ant-24 impairs skeletal muscle regeneration after injury.

| Transfection | MYOG-positive cell number   |                |       | MHC-positive cell number    |                |       |
|--------------|-----------------------------|----------------|-------|-----------------------------|----------------|-------|
|              | Total counts<br>(10 fields) | Percentage (%) |       | Total counts<br>(10 fields) | Percentage (%) |       |
|              |                             | Mean           | SD    |                             | Mean           | SD    |
| NC           | 291                         | 100            | 24.65 | 256                         | 100            | 11.82 |
| miR-24       | 554                         | 197.78         | 41.19 | 542                         | 213.83         | 27.72 |
| Ant-NC       | 259                         | 100            | 13.78 | 330                         | 100            | 22.04 |
| Ant-24       | 123                         | 48.22          | 8.28  | 179                         | 55.38          | 10.52 |

**Suppl Table 1: miR-24-3p increases and Ant-24 decreases number of MYOG- and MHC-positive cells.** Primary myoblast cells were transfected with mature miR-24-3p or GL2 as an NC twice at 24-hour intervals in GM, then replaced the GM with DM. Immunostaining on these cells was carried out for an early myogenic marker, myogenin (MYOG), and a late myogenic marker, myosin heavy chain (MHC) 24 and 48 hours after adding the DM, respectively. In a reciprocal experiment, primary myoblast cells were transfected twice with antagomirs specific to miR-24-3p (Ant-24) or GL2 (Ant-NC) at 24-hour intervals in GM, then replaced the GM with DM. Immunostaining on these cells was carried out for MYOG and MHC 24 and 48 hours after adding the DM, respectively. Fractions of MYOG- and MHC-positive cells were determined from 10 random fields, and data are presented relative to the NC or Ant-NC control as 100%.

| Oligos               | Sequence                                                                  |
|----------------------|---------------------------------------------------------------------------|
| U6sn primer          | CTGCGCAAGGATGACACGCA                                                      |
| miR-24 primer        | TGGCTCAGTTCAGCAGGAACAG                                                    |
| miR-192 primer       | CTGACCTATGAATTGACAGCC                                                     |
| Gapdh Forward primer | ATGACATCAAGAAGGTGGTGAAGC                                                  |
| Gapdh Reverse primer | GAAGAGTGGGAGTTGCTGTTGAAG                                                  |
| Rps13 Forward primer | TGACGACGTGAAGGAACAGATT                                                    |
| Rps13 Reverse primer | ATTTCCAGTCACAAAACGGACCT                                                   |
| Myog Forward primer  | AGCGCAGGCTCAAGAAAGTGAATG                                                  |
| Myog Reverse primer  | CTGTAGGCGCTCAATGTACTGGAT                                                  |
| Mhc Forward primer   | TCCAAACCGTCTCTGCACTGTT                                                    |
| Mhc Reverse primer   | AGCGTACAAAGTGTGGGTGTGT                                                    |
| Hmga1 Forward primer | CGACCAAAGGGAAGCAAGAATAA                                                   |
| Hmga1 Reverse primer | TCCTCTTCCTCCTTCTCCAGTTTC                                                  |
| Id3 Forward primer   | CTCTTAGCCTCTTGGACGACATGA                                                  |
| Id3 Reverse primer   | TGTAGTCTATGACACGCTGCAGGA                                                  |
| miR-24               | UGGCUCAGUUCAGCAGGAACAG                                                    |
| miR-24Mut            | UCGCACUGUUCUGCAGGAACAG                                                    |
| GL2                  | UCGAAGUAUJCCGCGUACG                                                       |
| Ant-24               | mU(*)mG(*)mGmCmUmCmAmGmUmUmCmAmGmCmAmGmGmA<br>mAmCmA(*)mG(*) (3'-Chl)     |
| Ant-NC               | mU(*)mA(*)mUmCmGmCmGmAmGmUmAmCmGmUmCmGmAmG<br>(*)mG(*)mC(*)mC(*) (3'-Chl) |

**Suppl Table 2: List of oligos used in this study.**

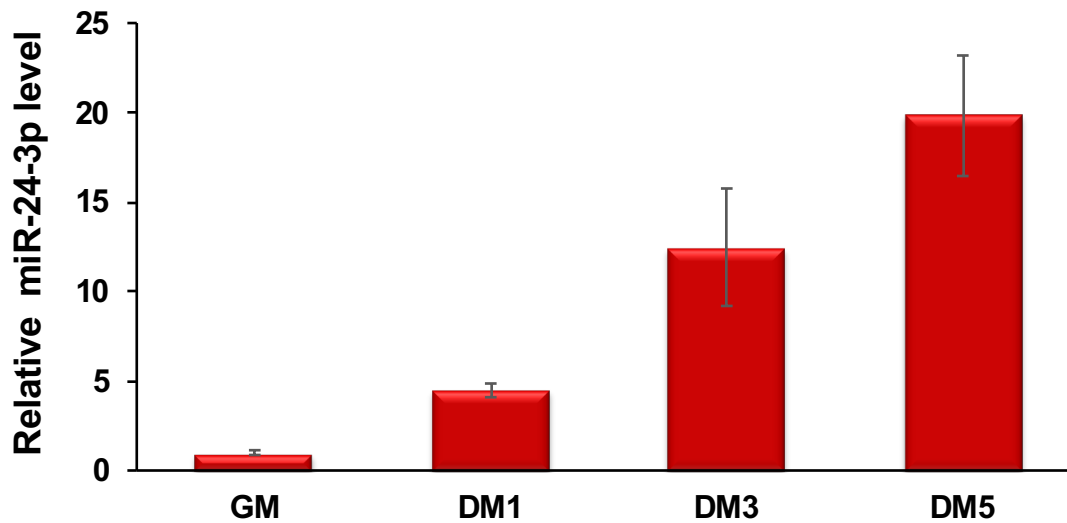

**Suppl Fig 1: miR-24-3p is upregulated during C2C12 myoblast differentiation.** qRT-PCR analyses show that miR-24-3p is upregulated during C2C12 myoblast differentiation. miR-24-3p values were first normalized to the U6sn values, and fold-change of miR-24-3p was determined relative to the undifferentiated myoblasts (GM). DM1, DM3, and DM5 indicates the number of days C2C12 myoblasts cultured in differentiation medium (DM). The values are expressed as Mean  $\pm$  SD of biological triplicates.

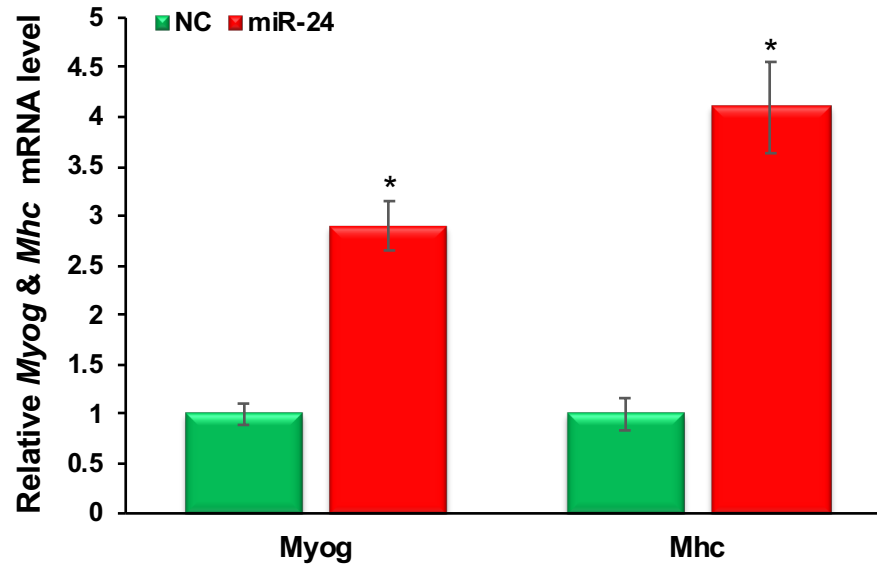

**Suppl Fig 2: miR-24-3p promotes C2C12 myoblast differentiation.** C2C12 myoblast cells were transfected twice at 24-hour intervals with GL2 negative control (NC) or miR-24-3p in GM. The cells were harvested after another 48 hours. qRT-PCR was carried out for *Myog* and *Mhc*, and the values were normalized to *Gapdh*, then again to the values of the NC samples. The values are expressed as Mean  $\pm$  SD of biological triplicates. \*P < 0.001.

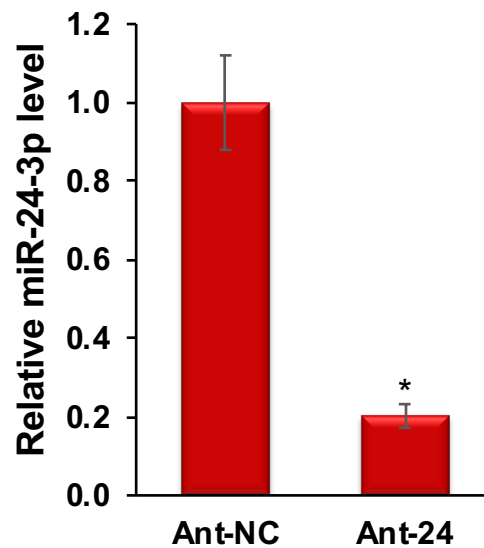

**Suppl Fig 3: miR-24-3p level is downregulated in the Ant-24-transfected primary myoblasts.** We transfected primary myoblast cells twice with antagomirs specific to miR-24-3p (Ant-24) or GL2 control (Ant-NC) at 24-hour intervals in GM and harvested the samples after another 48 hours. We performed qRT-PCR analyses for miR-24-3p. miR-24-3p values were normalized to the respective U6sn values. The values are expressed as Mean  $\pm$  SD of biological triplicates. \*P < 0.001.

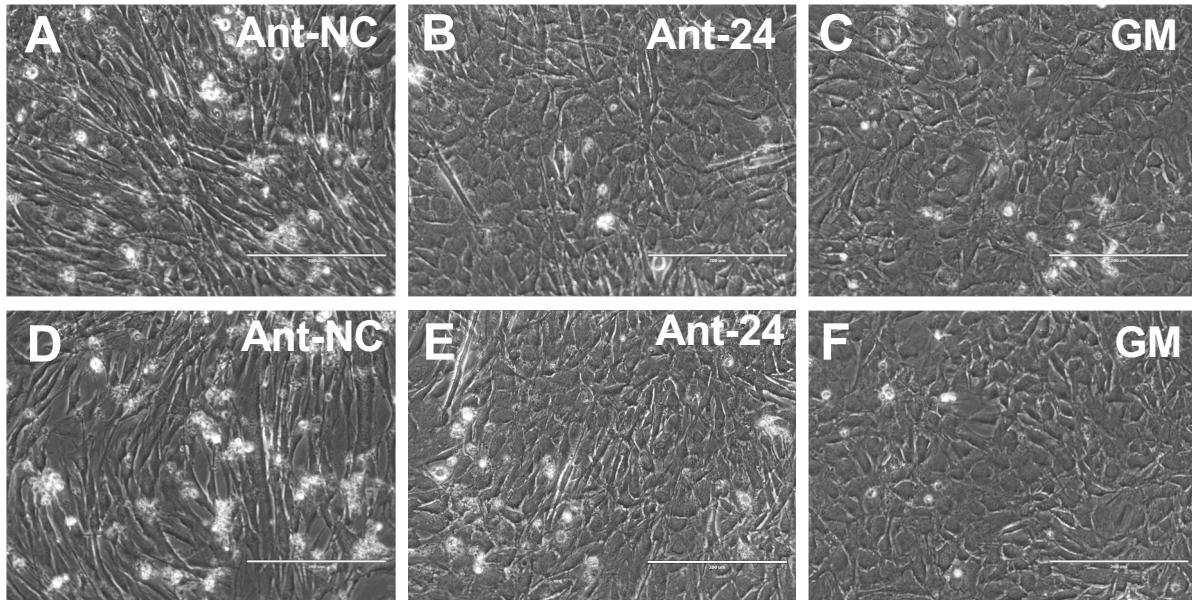

**Suppl Fig 4: Ant-24 represses primary myoblast differentiation.** We transfected primary myoblast cells twice with antagomirs specific to miR-24-3p (Ant-24) or GL2 control (Ant-NC) at 24-hour intervals in GM and replaced the GM with DM. We followed up these cells for 5 days. (A, D) Ant-NC-treated cells differentiate normally and forms multinucleated myotubes. (B, E) Ant-24-treated cells do not differentiate following the normal kinetics, and the majority of the cells looks like (C, F) proliferating myoblasts grown in GM. Scale Bar: 200  $\mu$ M.



position 311  
 target 5' U C UUC U 3'  
 CUG CCUGCUG CUG GCU  
 GAC GGACGAC GAC CGG  
 miRNA 3' AA UU U U 5'

position 182  
 target 5' C GCCC C C ACACCU C 3'  
 CUGU UCCU C GAAC GCC  
 GACA AGGA G CUUG CGG  
 miRNA 3' C A ACU U 5'

position 1087  
 target 5' U GUGGG GA G G 3'  
 UGUUCU G GGG UG GCCA  
 ACAAGG C CUU AC CGGU  
 miRNA 3' G A GA G U 5'

position 500  
 target 5' C CCCACCCU A A U 3'  
 UCCUGC AC GAG UCA  
 AGGACG UG CUC GGU  
 miRNA 3' GACA ACU A 5'

position 897  
 target 5' A UCA C U U 3'  
 UGU UCCU CUGAAUU GCC  
 ACA AGGA GACUUGA CGG  
 miRNA 3' G C CU U 5'

position 78  
 target 5' N CCCA C 3'  
 CCUGC U GGCC  
 GGACGA UCGG  
 miRNA 3' GACAA CUUGAC U 5'

position 1018  
 target 5' C GGA C A G G 3'  
 GU UGCUG AGC GAGU A  
 CA ACGAC UUG CUCG U  
 miRNA 3' GA AGG A G 5'

position 955  
 target 5' A GG G C 3'  
 G GGGCUGGG CG  
 C CUUGACUC GU  
 miRNA 3' GACAAGGA GA G 5'

position 344  
 target 5' G G AUUCCCU U 3'  
 UCCUG GAGC GGCC  
 AGGAC CUUG UCGG  
 miRNA 3' GACA GA AC U 5'

position 141  
 target 5' U C A C CCAAGG A 3'  
 CUG UCC GC G AC GAGC  
 GAC AGG CG C UG CUCG  
 miRNA 3' A A A U A GU 5'

**Suppl Fig 5: RNA hybrid microRNA target prediction algorithm identifies non-seed match miR-24-3p target sites in the 3'UTR of *Hmga1*.** We have identified eighteen non-seed match miR-24-3p target sites in the 3'UTR of *Hmga1*. Here, we have shown the top ten such miR-24-3p target sites.

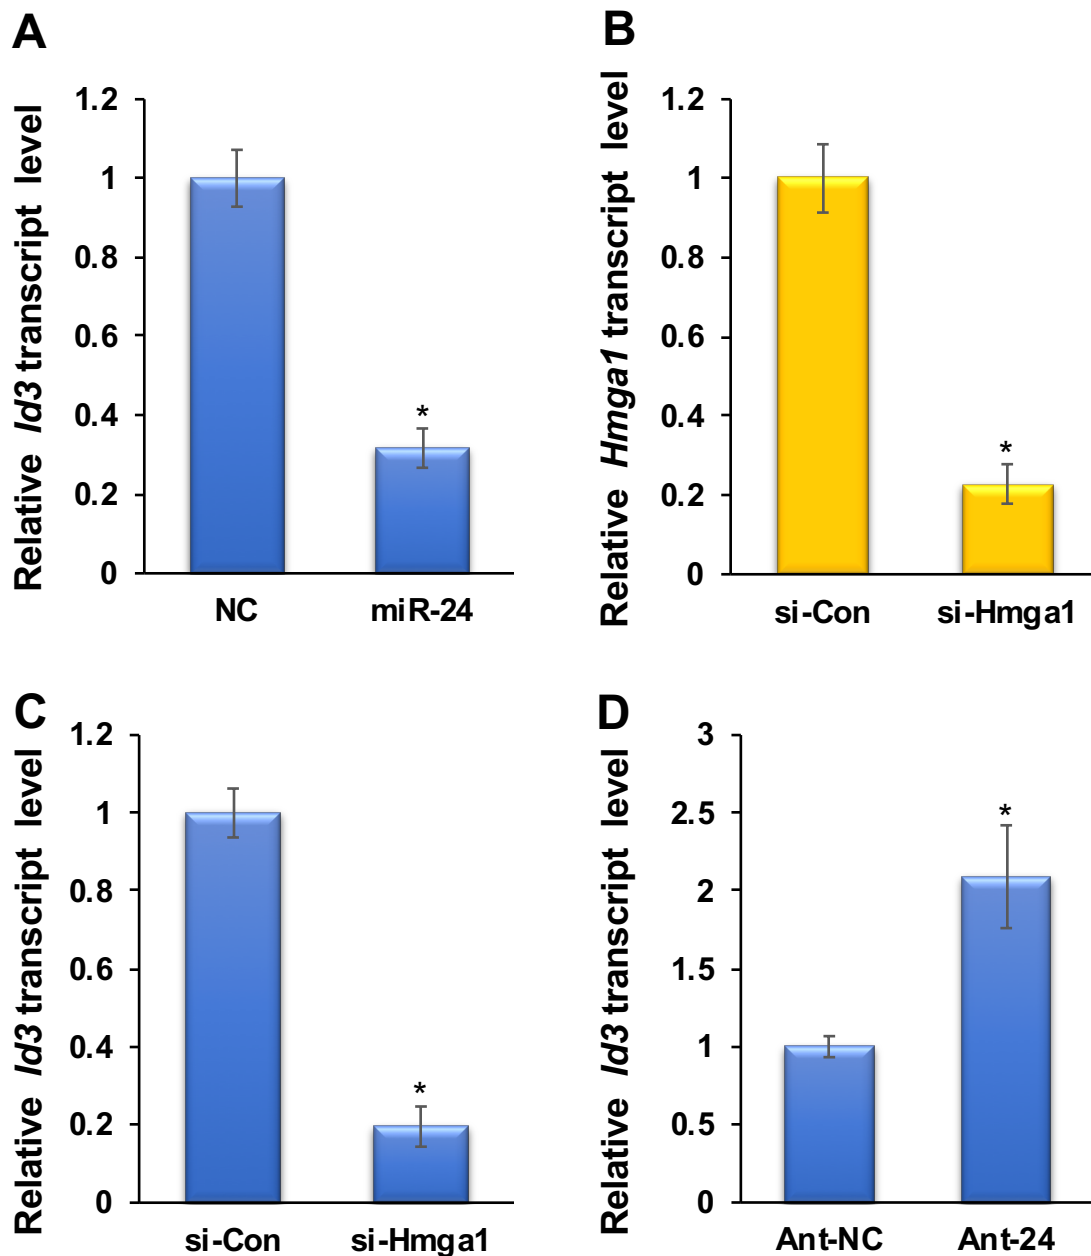

**Suppl Fig 6: miR-24-3p regulates HMGA1's direct downstream target *Id3* transcript level during myoblast differentiation.** (A) *Id3* transcript level is downregulated in miR-24-3p-transfected myoblasts. (B) *Hmga1* siRNA decreases *Hmga1* transcript level, and subsequently (C) decreases *Id3* transcript level. (D) Ant-24 derepresses *Id3* transcript level during myoblast differentiation. qRT-PCR was carried out for *Id3* or *Hmga1* and the values were normalized to the respective *Gapdh* values, then again to the values of the NC samples. The values are expressed as Mean  $\pm$  SD of biological triplicates. \*P < 0.001.

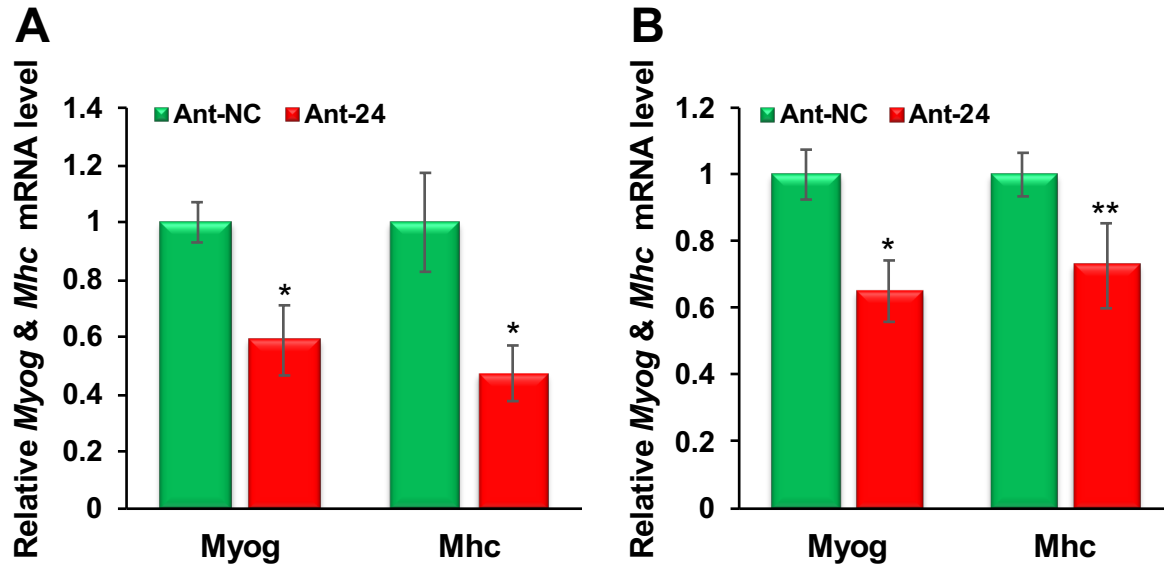

**Suppl Fig 7: *Myog* and *Mhc* levels are downregulated in the undifferentiated and differentiated MuSCs isolated from Ant-24-injected neonatal mice.** (A) *Myog* and *Mhc* mRNA levels are downregulated in the (A) undifferentiated and (B) differentiated (in DM for 48 hours) MuSCs. *Myog* and *Mhc* values were normalized with the respective RSP13 values, then again to the values of the Ant-NC samples. The values are expressed as Mean  $\pm$  SD of five neonatal mice. \*P < 0.001; \*\*P < 0.01.

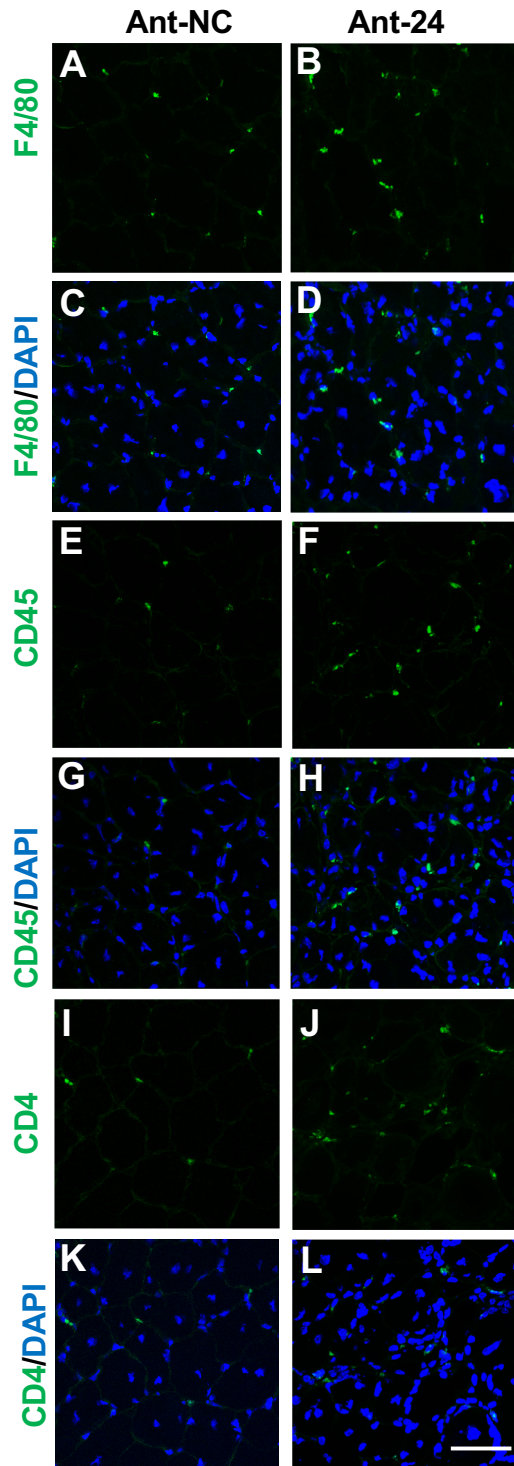

**Suppl Fig 8: Increased presence of various cells, including inflammatory cells are observed in the Ant-24-injected regenerating skeletal muscle.** Representative images of Ant-NC- and Ant-24-injected TA muscle sections immunostained with (A, B) F4/80, (C, D) F4/80 and DAPI, (E, F) CD45, (G, H) CD45 and DAPI, (I, J) CD4, (K, L) CD4 and DAPI. (A, C, E, G, I, K) Anti-NC-injected and (B, D, F, H, J, L) Ant-24-injected TA muscle sections on day 14 post-injury. Scale Bar: 50  $\mu$ M.

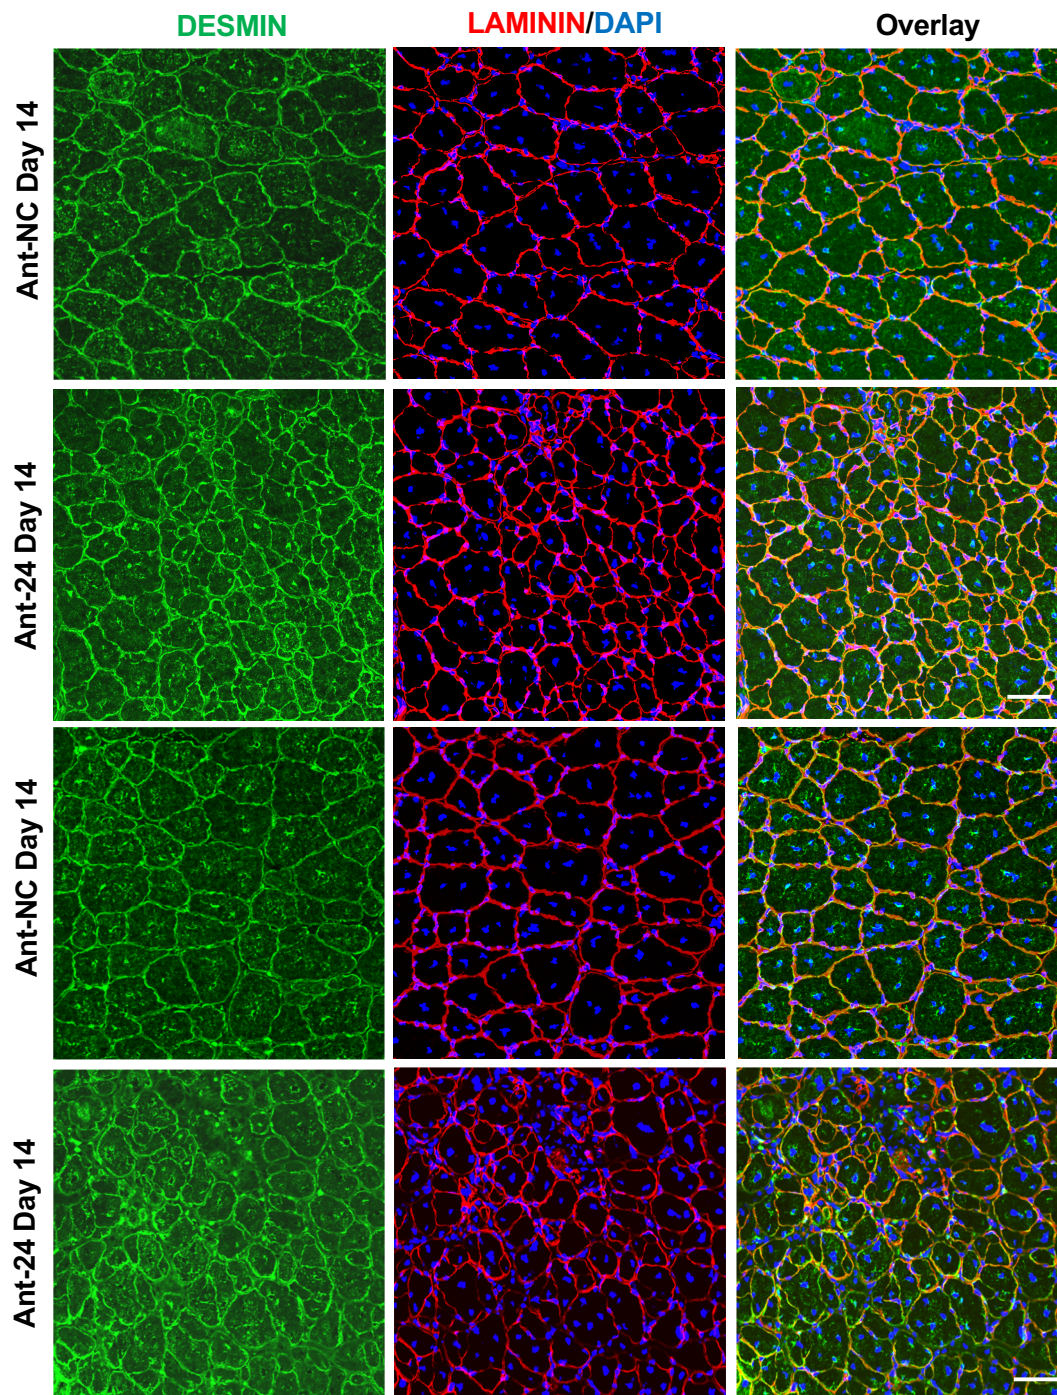

**Suppl Fig 9: Ant-24 impairs skeletal muscle regeneration after injury.** Additional representative images of Ant-NC- and Ant-24-injected TA muscle sections stained with DESMIN and LAMININ on day 14 post-injury. Ant-NC and Ant-24-injected samples are indicated. DESMIN (Green), LAMININ (red) and DAPI (Blue). Scale Bar: 50  $\mu$ M.
